# Supplementary material for: Disruption of Transporters Affiliated with Enantio-Pyochelin Biosynthesis Gene Cluster of Pseudomonas protegens Pf-5 Has Pleiotropic Effects
Source: PubMed Central journal article supplement (PMC4956303; doi:10.1371/journal.pone.0159884), 2016-07-21

**A****WT vs.  $\Delta pchH$** **WT vs.  $\Delta fetF$** **WT vs.  $\Delta 3504$** 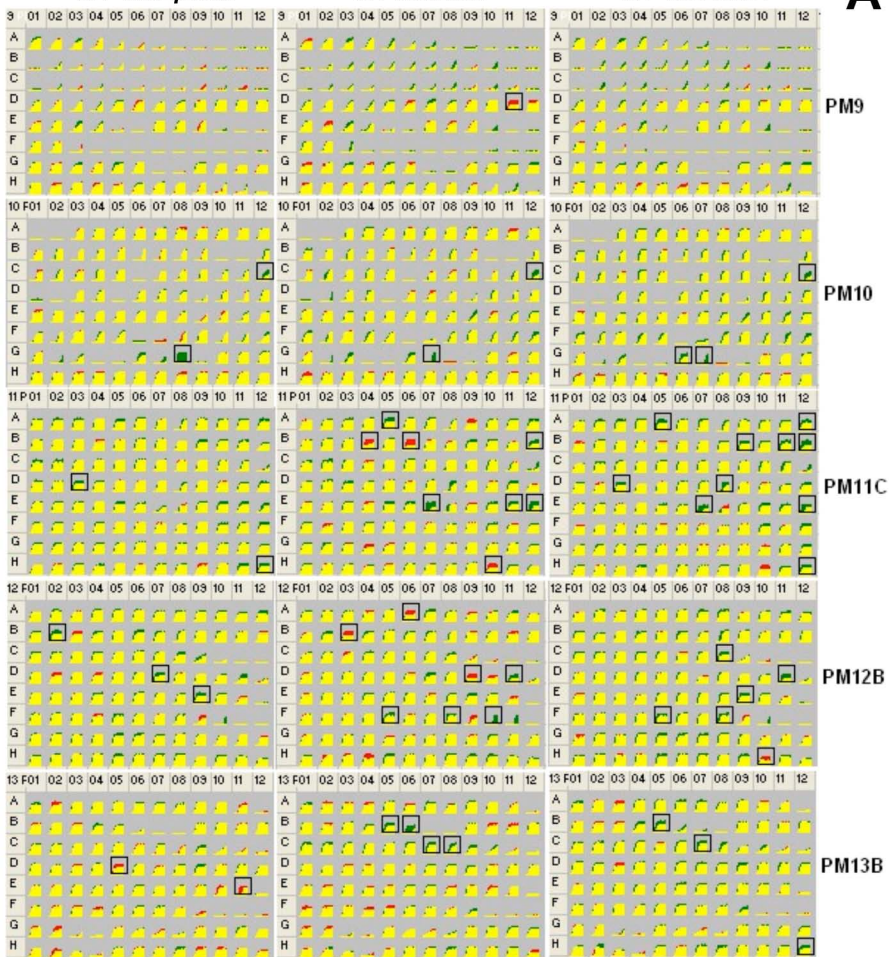

**B****WT vs.  $\Delta pchH$** **WT vs.  $\Delta fetF$** **WT vs.  $\Delta 3504$** 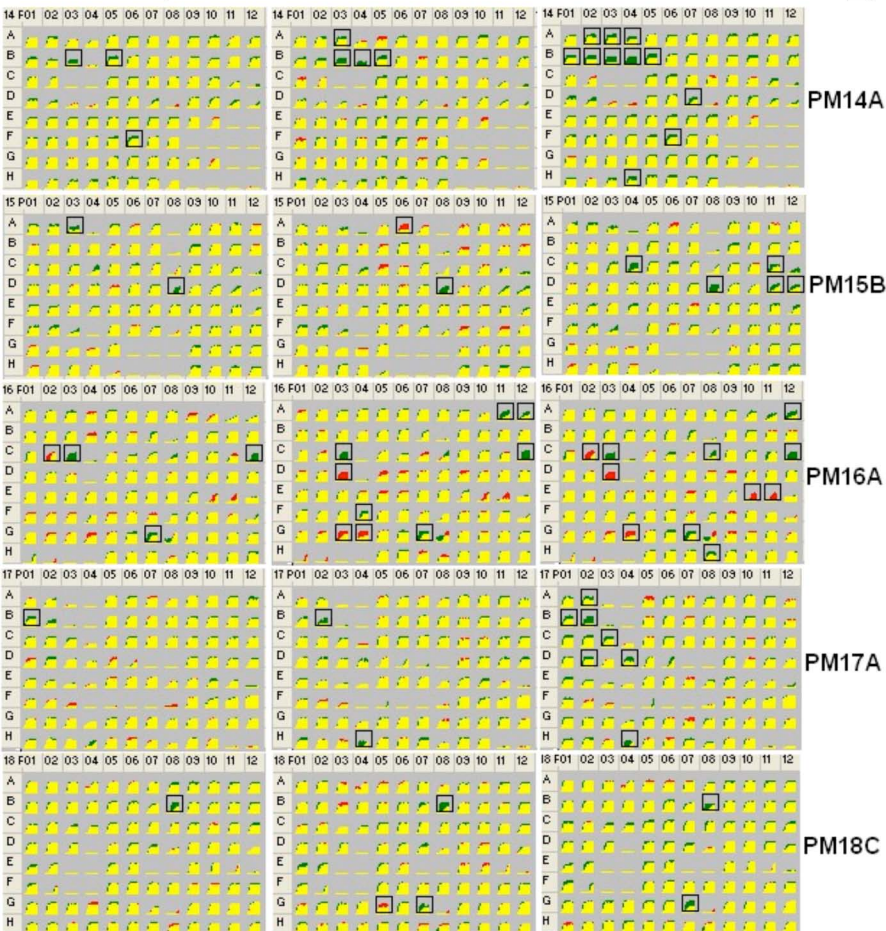

**C***WT vs. ΔpchH**WT vs. ΔfetF**WT vs. Δ3504*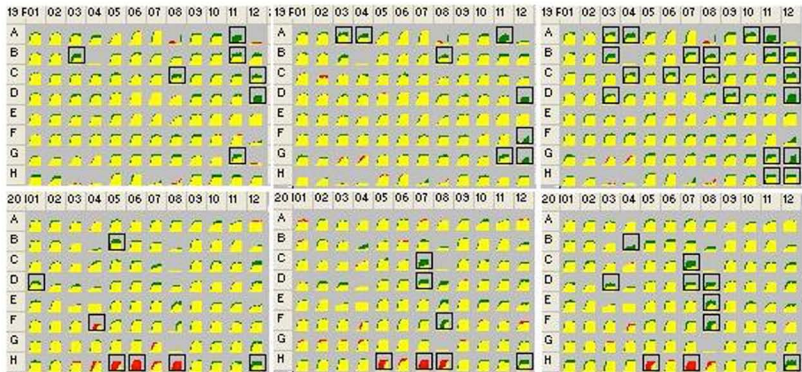

Supplement: pone.0159884.s004.pdf [file pone.0159884.s004.pdf]
